# Supplementary material
Source: Elsevier journal article supplement (https://rcastoragev2.blob.core.windows.net/5648b248dd7d979f23a2ba0b27844a84/mmc1.pdf)
Supplement: mmc1 [file mmc1.pdf]

# THE LANCET

## **Supplementary appendix**

This appendix formed part of the original submission and has been peer reviewed. We post it as supplied by the authors.

Supplement to: Pearce MS, Salotti JA, Little MP, et al. Radiation exposure from CT scans in childhood and subsequent risk of leukaemia and brain tumours: a retrospective cohort study. *Lancet* 2012; published online June 7. DOI:10.1016/S0140-6736(12)60815-0.

**Appendix 1. Leukaemia morphology codes (all behaviour code 3 unless otherwise stated)**

| Analysis sub-groups <sup>a</sup> | Leukaemia sub-group                                                    | Morphology                                                                           |
|----------------------------------|------------------------------------------------------------------------|--------------------------------------------------------------------------------------|
| b,d                              | acute myeloid leukaemia                                                | 9840, 9861, 9866, 9867,<br>9870-9874, 9891, 9895-<br>9897, 9910, 9920, 9930,<br>9931 |
| c                                | myelodysplastic syndromes                                              | 9980, 9982-9987, 9989                                                                |
| d                                | chronic myeloid leukaemia                                              | 9863, 9875, 9876                                                                     |
| d                                | other myeloproliferative disorders                                     | 9950, 9960-9964, 9975.1                                                              |
| a,d                              | acute lymphoblastic leukaemia/precursor B-cell lymphoblastic leukaemia | 9727-9729, 9835-9837                                                                 |
| d                                | myeloid (not otherwise specified (NOS))                                | 9860                                                                                 |
| d                                | chronic myelomonocytic leukaemia, NOS                                  | 9945                                                                                 |
| d                                | juvenile myelomonocytic leukaemia                                      | 9946                                                                                 |
| d                                | lymphoid, NOS                                                          | 9820                                                                                 |
| d                                | mixed myeloid/lymphoid lineage                                         | 9805                                                                                 |
| d                                | acute leukaemia, NOS                                                   | 9801                                                                                 |
| d                                | leukaemia, NOS                                                         | 9800                                                                                 |

<sup>a</sup> a) acute lymphoblastic leukaemia, b) acute myeloid leukaemia, (c) myelodysplastic syndromes, and (d) leukaemia excluding myelodysplastic syndrome

**Appendix 2. Brain tumour sub-group topography and morphology codes**

| Analysis sub-groups <sup>a</sup> | Brain sub-group | Morphology                                                                  |
|----------------------------------|-----------------|-----------------------------------------------------------------------------|
| a                                | glioma          | 9380-9480                                                                   |
| b                                | meningioma      | 9530-9539                                                                   |
| b                                | schwannoma      | 9560.0                                                                      |
|                                  | other brain     | All brain and central nervous system morphology codes excluding those above |

<sup>a</sup>Two analysis sub-groups were used a) Glioma and b) Meningioma plus schwannoma.

The following topography codes were used: C70.0, C70.9, C71.0-C71.9, C72.2-C72.5, C72.8, C72.9 for all sub-groups except meningioma which only included C70.0 & C70.9 and any behaviour code unless otherwise stated.

### Appendix 3. More detailed statistical methods.

A Poisson relative risk model was fitted by Poisson maximum likelihood (McCullagh & Nelder, 1989) in which the expected number of cases in stratum  $i$  with average attained age,  $a_i$ , dose  $(D_{i,j})_{j=1}^4$  (in Gy) accumulated in four age-at-exposure groups ( $j=1$  = age 0-4 years at exposure,  $j=2$  = age 5-9 years at exposure,  $j=3$  = age 10-14 years at exposure,  $j=4$  = age 15+ years at exposure) is:

$$PY_i \exp \left[ \sum_{i=1}^8 \chi_i \ln(a_i / 21)^i + \sum_{j=1}^N \eta_j Z_{ji} \right] \left[ 1 + \sum_{j=1}^4 (\alpha D_{i,j} + \beta D_{i,j}^2) \exp \left( \sum_{j=1}^N \phi_j Z_{ji} \right) \right] \quad (1)$$

For other covariates,  $(Z_{ji})$ , i.e., sex, SES quintile, time since first exposure.  $PY_i$  is the number of person years of follow-up in that stratum. Attained age, at time of exiting the study through a cancer diagnosis, death or loss-to-follow-up, or at the end of the study period, was centered by dividing by its approximate mean value, 21 years in order to stabilise regression parameter estimates. A similar model was fitted to allow for possible differing contributions by time before the cancer diagnosis, in which the  $(D_{i,j})_{j=1}^4$  (in Gy) represented the dose accumulated in four periods prior to cancer diagnosis:  $j=1$  = 2-4 years,  $j=2$  = 5-9 years,  $j=3$  = 10-14 years, and  $j=4$  = more than 15 years before diagnosis).

A variant model was fitted to leukaemia data, in which:

$$PY_i \exp \left[ \begin{aligned} &\chi_1 1_{0 \leq a_i < 5} + \chi_2 1_{5 \leq a_i < 10} + \chi_3 1_{10 \leq a_i < 20} \\ &+ \chi_4 1_{20 \leq a_i < 30} + \chi_5 1_{30 \leq a_i} + \sum_{j=1}^N \eta_j Z_{ji} \end{aligned} \right] \left[ 1 + \sum_{j=1}^4 (\alpha D_{i,j} + \beta D_{i,j}^2) \exp \left( \sum_{j=1}^N \phi_j Z_{ji} \right) \right] \quad (2)$$

### Reference

McCullagh P, Nelder JA. Generalized linear models. 2nd edition. Monographs on statistics and applied probability 37. 1-526. 1989. Boca Raton, FA, Chapman and Hall/CRC.

**Appendix 4. Examples of exclusions and lag periods for follow-up for brain tumours with an exclusion period of 5 years after 1<sup>st</sup> CT scan and a lag period of 5 years for each CT scan**

a) Patient excluded because they died or developed cancer within 5 yrs of 1<sup>st</sup> CT

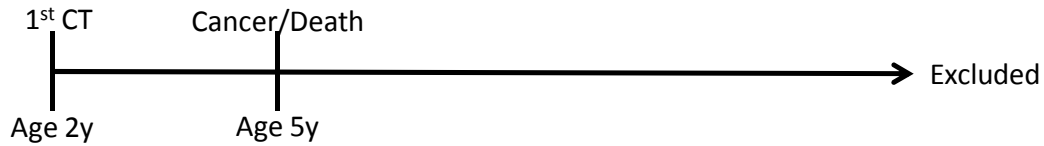

b) Patient included, follow-up starts at age 7 and cancer /death at age 11

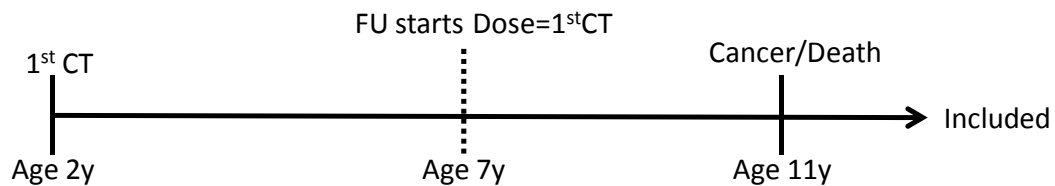

c) Patient included, follow-up starts age 7 for 1<sup>st</sup> CT and cancer /death age 11, 2<sup>nd</sup> CT dose not included

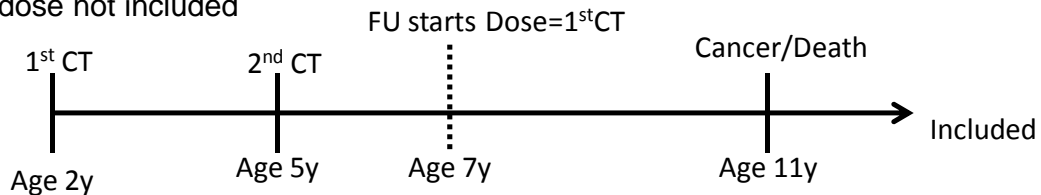

d) Patient included, follow-up starts age 7 for 1<sup>st</sup> CT and age 12 for 2<sup>nd</sup> CT

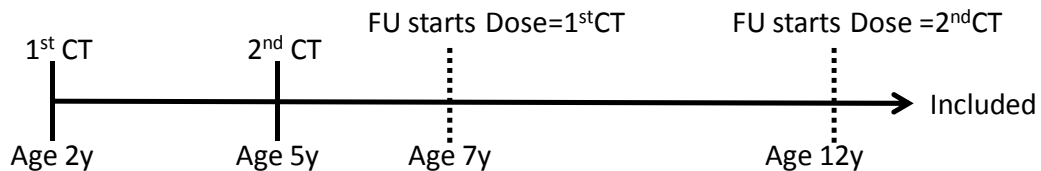

e) Patient excluded as they had cancer before the 1<sup>st</sup> CT

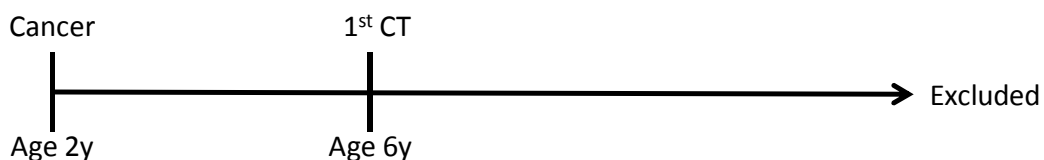

**Appendix 5. Types of CT scans that the patients underwent, in the leukaemia analysis (a) and the brain tumours analysis (b)\*, by age at CT scan**

**a) Leukaemia**

| CT scan type     | Age 0<5 |        | Age 5-<9 |        | Age 10-<15 |        | Age 15-21 |        | Total  |        |
|------------------|---------|--------|----------|--------|------------|--------|-----------|--------|--------|--------|
|                  | n       | %      | n        | %      | n          | %      | n         | %      | n      | %      |
| Head             | 50179   | 66.0%  | 25794    | 58.7%  | 30341      | 53.5%  | 55621     | 51.9%  | 161935 | 57.0%  |
| Partial head     | 3067    | 4.0%   | 3632     | 8.3%   | 5286       | 9.3%   | 8417      | 7.8%   | 20402  | 7.2%   |
| Facial bone      | 1108    | 1.5%   | 726      | 1.7%   | 1071       | 1.9%   | 2319      | 2.2%   | 5224   | 1.8%   |
| Abdomen          | 2404    | 3.2%   | 1914     | 4.4%   | 2712       | 4.8%   | 7960      | 7.4%   | 14990  | 5.3%   |
| Abdomen + pelvis | 211     | 0.3%   | 235      | 0.5%   | 475        | 0.8%   | 1435      | 1.3%   | 2356   | 0.8%   |
| Pelvis           | 1100    | 1.4%   | 660      | 1.5%   | 1360       | 2.4%   | 5229      | 4.9%   | 8349   | 2.9%   |
| Chest            | 4658    | 6.1%   | 2676     | 6.1%   | 3062       | 5.4%   | 6048      | 5.6%   | 16444  | 5.8%   |
| HRCT             | 772     | 1.0%   | 685      | 1.6%   | 476        | 0.8%   | 533       | 0.5%   | 2466   | 0.9%   |
| Whole body       | 107     | 0.1%   | 75       | 0.2%   | 96         | 0.2%   | 536       | 0.5%   | 814    | 0.3%   |
| Cervical spine   | 848     | 1.1%   | 687      | 1.6%   | 1061       | 1.9%   | 2330      | 2.2%   | 4926   | 1.7%   |
| Lumbar spine     | 74      | 0.1%   | 79       | 0.2%   | 314        | 0.6%   | 1414      | 1.3%   | 1881   | 0.7%   |
| Thoracic spine   | 21      | 0.0%   | 17       | 0.0%   | 49         | 0.1%   | 169       | 0.2%   | 256    | 0.1%   |
| Spine            | 512     | 0.7%   | 592      | 1.3%   | 1167       | 2.1%   | 3335      | 3.1%   | 5606   | 2.0%   |
| Extremity        | 2665    | 3.5%   | 2477     | 5.6%   | 5561       | 9.8%   | 7418      | 6.9%   | 18121  | 6.4%   |
| Hip              | 786     | 1.0%   | 158      | 0.4%   | 289        | 0.5%   | 402       | 0.4%   | 1635   | 0.6%   |
| Shoulder         | 19      | 0.0%   | 43       | 0.1%   | 119        | 0.2%   | 281       | 0.3%   | 462    | 0.2%   |
| Total            | 75982   | 100.0% | 43937    | 100.0% | 56753      | 100.0% | 107247    | 100.0% | 283919 | 100.0% |

**b) Brain tumours**

| CT scan type     | Age 0<5 |        | Age 5-<9 |        | Age 10-<15 |        | Age 15-21 |        | Total  |        |
|------------------|---------|--------|----------|--------|------------|--------|-----------|--------|--------|--------|
|                  | n       | %      | n        | %      | n          | %      | n         | %      | n      | %      |
| Head             | 49333   | 66.1%  | 25526    | 58.8%  | 30088      | 53.5%  | 54776     | 51.9%  | 159723 | 57.1%  |
| Partial head     | 3034    | 4.1%   | 3609     | 8.3%   | 5250       | 9.3%   | 8335      | 7.9%   | 20228  | 7.2%   |
| Facial bone      | 1101    | 1.5%   | 724      | 1.7%   | 1068       | 1.9%   | 2292      | 2.2%   | 5185   | 1.9%   |
| Abdomen          | 2329    | 3.1%   | 1875     | 4.3%   | 2679       | 4.8%   | 7786      | 7.4%   | 14669  | 5.2%   |
| Abdomen + pelvis | 1081    | 1.4%   | 646      | 1.5%   | 1347       | 2.4%   | 5154      | 4.9%   | 8228   | 2.9%   |
| Pelvis           | 211     | 0.3%   | 232      | 0.5%   | 472        | 0.8%   | 1399      | 1.3%   | 2314   | 0.8%   |
| Chest            | 4573    | 6.1%   | 2616     | 6.0%   | 2977       | 5.3%   | 5874      | 5.6%   | 16040  | 5.7%   |
| HRCT             | 767     | 1.0%   | 680      | 1.6%   | 475        | 0.8%   | 514       | 0.5%   | 2436   | 0.9%   |
| Whole body       | 106     | 0.1%   | 71       | 0.2%   | 92         | 0.2%   | 515       | 0.5%   | 784    | 0.3%   |
| Cervical spine   | 832     | 1.1%   | 682      | 1.6%   | 1055       | 1.9%   | 2297      | 2.2%   | 4866   | 1.7%   |
| Lumbar spine     | 74      | 0.1%   | 79       | 0.2%   | 314        | 0.6%   | 1404      | 1.3%   | 1871   | 0.7%   |
| Thoracic spine   | 21      | 0.0%   | 17       | 0.0%   | 49         | 0.1%   | 165       | 0.2%   | 252    | 0.1%   |
| Spine            | 503     | 0.7%   | 589      | 1.4%   | 1163       | 2.1%   | 3292      | 3.1%   | 5547   | 2.0%   |
| Extremity        | 2651    | 3.6%   | 2455     | 5.7%   | 5526       | 9.8%   | 7338      | 7.0%   | 17970  | 6.4%   |
| Hip              | 782     | 1.0%   | 158      | 0.4%   | 289        | 0.5%   | 400       | 0.4%   | 1629   | 0.6%   |
| Shoulder         | 19      | 0.0%   | 43       | 0.1%   | 119        | 0.2%   | 278       | 0.3%   | 459    | 0.2%   |
| Total            | 74658   | 100.0% | 43427    | 100.0% | 56205      | 100.0% | 105534    | 100.0% | 279824 | 100.0% |

\*The number of CT scans is smaller in the brain tumour analysis because the exclusion and lag period was longer (5 years rather than 2 years in the leukaemia analysis).

**Appendix 6. Relative risk (and 95% CIs) for leukaemia and brain tumours in relation to red bone marrow and brain categories dose, respectively**

**a) Leukaemia dose response**

|                           | Dose group (mGy) |              |              |              |              |              |
|---------------------------|------------------|--------------|--------------|--------------|--------------|--------------|
|                           | <5               | 5-9          | 10-14        | 15-19        | 20-29        | 30+          |
| Cases                     | 15               | 17           | 12           | 11           | 4            | 15           |
| Person-years              | 588450           | 438828       | 213289       | 244844       | 70523        | 165049       |
| Mean dose per group (mGy) | 2.32             | 7.08         | 12.34        | 16.54        | 24.69        | 51.13        |
| Relative risk             | 1                | 1.44         | 2.03         | 1.53         | 2.02         | 3.18         |
| (95% CI)                  |                  | (0.70, 2.99) | (0.89, 4.54) | (0.63, 3.59) | (0.56, 5.83) | (1.46, 6.94) |

**b) Brain cancer dose response**

|                           | Dose group (mGy) |              |              |              |              |              |               |               |
|---------------------------|------------------|--------------|--------------|--------------|--------------|--------------|---------------|---------------|
|                           | <5               | 5-29         | 30-49        | 50-74        | 75-99        | 100-149      | 150-199       | 200+          |
| Cases                     | 13               | 14           | 55           | 16           | 11           | 10           | 5             | 11            |
| Person-years              | 219936           | 157591       | 545416       | 100203       | 88554        | 41209        | 15538         | 19760         |
| Mean dose per group (mGy) | 0.25             | 21.38        | 40.29        | 60.42        | 84.36        | 119.77       | 170.22        | 330.18        |
| Relative risk             | 1                | 1.53         | 1.65         | 2.82         | 2.05         | 4.05         | 5.26          | 8.74          |
| (95% CI)                  |                  | (0.72, 3.30) | (0.93, 3.16) | (1.34, 6.03) | (0.90, 4.62) | (1.71, 9.33) | (1.68, 14.11) | (3.77, 19.91) |

**c) Brain cancer dose response (collapsed upper dose group)**

|                           | Dose group (mGy) |              |              |              |
|---------------------------|------------------|--------------|--------------|--------------|
|                           | <5               | 5-29         | 30-49        | 50+          |
| Cases                     | 13               | 14           | 55           | 53           |
| Person-years              | 219936           | 157591       | 545416       | 265264       |
| Mean dose per group (mGy) | 0.25             | 21.38        | 40.29        | 104.16       |
| Relative risk             | 1                | 1.53         | 1.64         | 3.32         |
| (95% CI)                  |                  | (0.72, 3.30) | (0.92, 3.14) | (1.84, 6.42) |

**Appendix 7. Sensitivity analyses: Excess relative risks (ERR) for cancer subtypes in relation to organ-specific radiation doses received from CT scans by young people in Great Britain, 1985 to 2002.**

|                                                                                              | Cases | ERR (/mGy red bone marrow dose) (95% CI)      | p-value (test for dose) |
|----------------------------------------------------------------------------------------------|-------|-----------------------------------------------|-------------------------|
| <b>Leukaemia follow-up to 31/12/2004, 2 year lag, 2 year exclusions</b>                      |       |                                               |                         |
| All leukaemias including myelodysplastic syndromes                                           | 48    | 0.1073 (0.0228, 0.6255)                       | 0.0003                  |
| Acute lymphoblastic leukaemia                                                                | 22    | 1.5020 <sup>a</sup> (>0, 15.66 <sup>b</sup> ) | 0.0029                  |
| Acute myeloid leukaemia                                                                      | 10    | 0.2588 (0.0100, 8.001)                        | 0.0150                  |
| Myelodysplastic syndromes                                                                    | 7     | 4.486 <sup>a</sup> (>0, 96.70 <sup>b</sup> )  | 0.0048                  |
| All leukaemias excluding myelodysplastic syndromes                                           | 41    | 0.0660 (0.0077, 0.3802)                       | 0.0101                  |
| <b>Leukaemia follow-up to 31/12/2008, 2 year lag, 2 year exclusions, age &lt; 25</b>         |       |                                               |                         |
| All leukaemias including myelodysplastic syndromes                                           | 60    | 0.0539 (0.0097, 0.2243)                       | 0.0033                  |
| <b>Leukaemia follow-up to 31/12/2008, 2 year lag, 2 year exclusions, no scans in 2002</b>    |       |                                               |                         |
| All leukaemias including myelodysplastic syndromes                                           | 68    | 0.0231 (-0.0005, 0.0869)                      | 0.0594                  |
| <b>Brain cancer follow-up to 31/12/2008, 5 year lag, 10 year exclusions</b>                  |       |                                               |                         |
|                                                                                              | Cases | ERR (/mGy brain dose) (95% CI)                | p-value (test for dose) |
| All brain                                                                                    | 59    | 0.0447 (0.0119, 0.2107)                       | <0.0001                 |
| Glioma                                                                                       | 27    | 0.0119 (-0.0119 <sup>b</sup> , 0.0850)        | 0.1143                  |
| Schwannoma + meningioma (+meningioma NOS)                                                    | 12    | 0.0442 (-0.0764 <sup>b</sup> , 19.22)         | 0.0963                  |
| <b>Brain cancer follow-up to 31/12/2008, 5 year lag, 5 year exclusions, age &lt; 28</b>      |       |                                               |                         |
| All brain                                                                                    | 104   | 0.0194 (0.0074, 0.0466)                       | <0.0001                 |
| <b>Brain cancer follow-up to 31/12/2008, 5 year lag, 5 year exclusions, no scans in 2002</b> |       |                                               |                         |
| All brain                                                                                    | 134   | 0.0245 (0.0106, 0.0535)                       | <0.0001                 |

<sup>a</sup>indications that the iteratively reweighted least-squares algorithm failed to converge, so that parameter estimates may be unreliable

<sup>b</sup>Wald-based CI



## Appendix 8. Excess risk in the Japanese atomic bomb survivor Life Span Study (LSS) incidence data.

The publicly downloadable data relating to the latest published analysis of the leukaemia (Preston et al, 1994) and solid cancer (Preston et al, 2007) LSS incidence data was used.

A linear relative risk model was fitted to both datasets, with semi-parametric background model adjusted for city, sex, age at exposure and time since exposure (for leukaemia) and for city, sex, age at exposure and age (for brain). In both cases, and as with many recent RERF analyses, the so-called not-in-city group of survivors were excluded, as these are thought to be socioeconomically distinct from the exposed group, as also those with kerma doses > 4 Gy, which are thought to be less reliable. The appropriate organ dose was used, and in each case a neutron relative biological effectiveness of 10 was used.

### Excess relative risk /mSv (and 95% CI) in fits to leukaemia and brain cancer

| <b>Leukaemia (AML+CML+ALL)</b>                            | <b>ERR (/mSv red bone marrow dose) (95% CI)</b> |
|-----------------------------------------------------------|-------------------------------------------------|
| Age at exposure < 20, all follow-up                       | 0.01035 (0.00538, 0.01997)                      |
| Age at exposure < 20, follow-up < 20 years after exposure | 0.03708 (0.01422, 0.1272)                       |
| Age at exposure < 20, follow-up < 15 years after exposure | 0.04505 (0.01573, 0.1882)                       |
| <b>Brain cancer</b>                                       | <b>ERR (/mSv brain dose) (95% CI)</b>           |
| Age at exposure < 20, all follow-up                       | 0.00095 (0.00017, 0.00219)                      |
| Age at exposure < 20, follow-up < 20 years after exposure | 0.00614 (0.00012, 0.06393)                      |

### References

Preston DL, Kusumi S, Tomonaga M et al. Cancer incidence in atomic bomb survivors. Part III. Leukemia, lymphoma and multiple myeloma, 1950-1987.

Radiat Res 1994;137:S68-S97.

Preston DL, Ron E, Tokuoka S et al. Solid cancer incidence in atomic bomb survivors: 1958-1998. Radiat Res 2007;168:1-64

**Appendix 9. Population risks for UK population (2001 incidence rates, 2003 mortality rates) predicted by nominal leukaemia and brain/CNS relative risk coefficients**

**Risks (% radiation exposure induced cancer incidence (REIC)/ radiation exposure induced death (REID)) to UK population (2001 incidence, 2003 mortality) (and 95% CI) by period of expression (after exposure) from an organ dose of 10 mGy given at age 0-19, assuming nominal risk coefficients of leukaemia and brain/CNS cancer derived from the present study. These risks can be combined with the dose estimates per scan from Table 1 to estimate cumulative absolute risk estimates for specific exposure scenarios.**

| Expression<br>period<br>(years after<br>exposure) | Incidence               | Mortality               |
|---------------------------------------------------|-------------------------|-------------------------|
| Leukaemia                                         |                         |                         |
| 2-10                                              | 0.0083 (0.0012, 0.0277) | 0.0030 (0.0004, 0.0099) |
| 2-20                                              | 0.0164 (0.0024, 0.0546) | 0.0064 (0.0009, 0.0212) |
| Brain/CNS                                         |                         |                         |
| 5-10                                              | 0.0032 (0.0014, 0.0069) | 0.0012 (0.0005, 0.0026) |
| 5-20                                              | 0.0089 (0.0038, 0.0193) | 0.0041 (0.0018, 0.0089) |
